# Supplementary material
Source: publisher site journal article supplement (https://www.dovepress.com/article/592463)
Supplement: Supplementary file 1 [file Supplementary%20Table%20S1.docx]

**Supplementary Table S1.** IPTW analysis of primary outcomes

| Primary outcome | Effect estimate (IVSA vs LA) | 95% CI | *P* |
| --- | --- | --- | --- |
| Patient-reported intraoperative comfort score | β = 3.741 | 3.580 to 3.901 | <0.001 |
| Patient-reported maximum intraoperative pain score | β = –3.853 | –4.010 to –3.696 | <0.001 |
| Operative time | GMR = 0.967 | 0.924 to 1.012 | 0.145 |

**Notes:** Data are from the original cohort (n = 1,068) analyzed using stabilized IPTW and GEE with an exchangeable correlation structure. All models were adjusted for age, BMI, sex, ASA status, comorbidities, and procedure type. Linear GEE models with identity link were used for comfort and pain scores; a gamma GEE model with log link was used for operative time. Robust sandwich variance estimators were used.

**Abbreviations:** IPTW, inverse probability weighting; IVSA, intravenous sedation-analgesia; LA, local anesthesia; CI, confidence interval; GMR, geometric mean ratio; GEE, generalized estimating equation.
